# Supplementary material
Source: PubMed Central journal article supplement (PMC6364535)
Supplement: CJN.08150718SupplementaryData.pdf [file CJN.08150718SupplementaryData.pdf]

*Supplemental material is neither peer-reviewed nor thoroughly edited by CJASN. The authors alone are responsible for the accuracy and presentation of the material.*

**Supplemental Material: Table of Contents**

Supplemental Table 1. Responding countries (n=90).

Supplemental Table 2. Funding and country characteristics. HD and PD funding: annual funding per patient for hemodialysis and peritoneal dialysis in US\$. GDPc: gross domestic product per capita in US\$. Public HE (%GDP): % of GDP spent on public health expenditure. Dialysis funding (%HE): % public health expenditure spent on public funding of dialysis. HD pmp: prevalence of hemodialysis per million population. PD pmp: prevalence of peritoneal dialysis per million population. POP. Population in million inhabitants.

Supplemental Table 3. Countries with a pay-for-quality system for dialysis. Government funding is made dependent on parathyroid hormone (PTH) level, urea clearance Kt/V, dialysis access type, calcium and/or phosphate level (Ca and/or P), pre-dialysis education delivered, haemoglobin (Hb), dialysis length (time), water quality, and/or infection control.

Supplemental Table 4. Prevention strategies according to different World Bank income groups. LIC: low income countries, LMIC: lower-middle income countries, UMIC: upper-middle income countries, HIC: high income countries, CKD: chronic kidney disease.

Supplemental material is neither peer-reviewed nor thoroughly edited by CJASN. The authors alone are responsible for the accuracy and presentation of the material.

**Supplemental Table 1. Responding countries (n=90)**

| North America                                                                                          | South America                                                                      | Europe                                                                                                                                                                                                                                                                                                                                                                                                                                                                 | Asia                                                                                                                                                                                                                            | Africa                                                                                                                                                             | Oceania                  |
|--------------------------------------------------------------------------------------------------------|------------------------------------------------------------------------------------|------------------------------------------------------------------------------------------------------------------------------------------------------------------------------------------------------------------------------------------------------------------------------------------------------------------------------------------------------------------------------------------------------------------------------------------------------------------------|---------------------------------------------------------------------------------------------------------------------------------------------------------------------------------------------------------------------------------|--------------------------------------------------------------------------------------------------------------------------------------------------------------------|--------------------------|
| Aruba<br>Canada<br>Costa Rica<br>Curaçao<br>Mexico<br>Panama<br>St Maarten<br>United States of America | Argentina<br>Bolivia<br>Brazil<br>Chile<br>Colombia<br>Uruguay<br>Paraguay<br>Peru | Albania<br>Austria<br>Belarus<br>Belgium<br>Bosnia-Herzegovina<br>Bulgaria<br>Croatia<br>Czech Republic Denmark<br>Estonia<br>Finland<br>France<br>FYROM<br>Georgia<br>Germany<br>Greece<br>Hungary<br>Iceland<br>Ireland<br>Italy<br>Kosovo<br>Latvia<br>Lithuania Montenegro<br>the Netherlands Norway<br>Poland<br>Portugal<br>Romania<br>Russian Federation<br>Serbia<br>Slovenia<br>Slovak Republic<br>Spain<br>Sweden<br>Switzerland<br>Turkey<br>United Kingdom | Bangladesh<br>Cambodia<br>China (PR)<br>Dubai<br>Hong Kong<br>India<br>Indonesia<br>Iran<br>Israel<br>Japan<br>Jordan<br>Lebanon<br>Malaysia<br>Pakistan<br>Philippines<br>Saudi-Arabia<br>Singapore South<br>Korea<br>Thailand | Algeria<br>Burundi<br>Cameroon<br>Congo (DR)<br>Egypt<br>Ethiopia<br>Ghana<br>Ivory Coast Niger<br>Nigeria Morocco<br>Rwanda<br>Senegal<br>South-Africa<br>Tunisia | Australia<br>New Zealand |

Supplemental material is neither peer-reviewed nor thoroughly edited by CJASN. The authors alone are responsible for the accuracy and presentation of the material.

**Supplemental Table 2. Funding and country characteristics**

| Country    | HD fund | PD fund | GDPc  | PHE (%GDP) | FD (%HE) | PD pmp | HD pmp | POP     |
|------------|---------|---------|-------|------------|----------|--------|--------|---------|
| Albania    | 15081   | 11078   | 4147  | 2.94       | 3.35     | 18.1   | 256.9  | 3.20    |
| Algeria    | 9152    | *       | 3844  | 5.24       | 2.55     | 15.9   | 561.0  | 41.00   |
| Argentina  | 15600   | 18000   | 12449 | 2.65       | 3.22     | 27.1   | 650.8  | 42.70   |
| Aruba      | 75660   | 82284   | 25751 | *          | *        | 150.0  | 1450.0 | 0.10    |
| Australia  | 56746   | 41369   | 49928 | 6.32       | 0.84     | 96.8   | 392.6  | 24.50   |
| Austria    | 55062   | 26373   | 44177 | 8.73       | 0.71     | 46.4   | 474.7  | 8.50    |
| Bangladesh | 3900    | **      | 1359  | 0.79       | 4.07     | 5.4    | 111.5  | 161.00  |
| Belarus    | 5070    | 6789    | 4989  | 3.74       | 0.96     | 43.3   | 295.6  | 9.50    |
| Belgium    | 64531   | 57851   | 41096 | 8.25       | 1.36     | 55.6   | 664.7  | 10.80   |
| Bolivia    | 18720   | ***     | 3105  | 4.57       | 1.73     | ***    | 130.8  | 10.70   |
| Bosnia-H.  | 17536   | 41029   | 4709  | 6.81       | 3.93     | 21.3   | 669.5  | 3.80    |
| Brazil     | 8700    | 7079    | 8650  | 3.83       | 1.44     | 38.3   | 517.1  | 200.40  |
| Bulgaria   | 13152   | 19284   | 7351  | 4.61       | 1.98     | 22.1   | 478.5  | 7.20    |
| Burundi    | 12480   | ***     | 286   | 3.97       | 0.20     | ***    | 1.9    | 8.60    |
| Cameroon   | 1560    | ***     | 1033  | 0.94       | 0.65     | ***    | 40.5   | 19.40   |
| Canada     | 38136   | 22824   | 42158 | 7.41       | 0.85     | 144.0  | 612.0  | 36.20   |
| Chile      | 13166   | 16425   | 13793 | 3.85       | 2.94     | 65.8   | 1105.8 | 18.00   |
| Colombia   | 9079    | 9205    | 5806  | 5.41       | 1.46     | 136.5  | 365.1  | 48.20   |
| Costa Rica | 93600   | 21900   | 11825 | 6.77       | 0.64     | 72.9   | 37.5   | 4.80    |
| Croatia    | 21690   | 24143   | 12091 | 6.39       | 1.75     | 37.0   | 583.0  | 4.07    |
| Curacao    | 58500   | 33580   | 20828 |            |          | 346.7  | 1533.3 | 0.15    |
| Czech Rep. | 21709   | 24296   | 18267 | 6.26       | 1.17     | 46.6   | 566.0  | 10.50   |
| Denmark    | 59576   | 28102   | 53418 | 9.16       | 0.48     | 98.4   | 350.7  | 5.60    |
| Dubai      | 59436   | 99280   | 37622 | 2.64       | 1.72     | 27.0   | 242.0  | 9.30    |
| Egypt      | 2449    | 2508    | 3514  | 2.16       | 2.17     | 100.6  | 569.8  | 89.50   |
| Estonia    | 23498   | 16412   | 17575 | 5.03       | 0.57     | 37.7   | 188.5  | 1.30    |
| Finland    | 61375   | 33722   | 43090 | 7.29       | 0.59     | 58.9   | 267.9  | 5.60    |
| France     | 43664   | 32090   | 36855 | 9.02       | 0.83     | 45.1   | 600.3  | 65.80   |
| Georgia    | 5876    | 10064   | 3854  | 1.55       | 3.53     | 20.9   | 324.1  | 4.40    |
| Germany    | 52957   | 29518   | 41936 | 8.70       | 1.40     | 62.0   | 930.5  | 80.60   |
| Greece     | 22095   | 24617   | 18104 | 4.99       | 2.30     | 63.4   | 869.6  | 10.80   |
| Hongkong   | 14820   | 10220   | 43681 | *          | *        | 573.2  | 186.2  | 7.10    |
| Hungary    | 12363   | 14155   | 12665 | 4.88       | 1.30     | 64.0   | 579.0  | 10.00   |
| Iceland    | 73320   | 17155   | 59977 | 7.18       | 0.32     | 40.0   | 160.0  | 0.30    |
| India      | 2444    | **      | 1709  | 1.41       | 0.71     | 7.4    | 70.2   | 1210.00 |
| Indonesia  | 10140   | 6935    | 3570  | 1.08       | 7.42     | 6.7    | 276.5  | 250.00  |
| Iran       | 10920   | 12775   | 4958  | 2.84       | 2.90     | 20.2   | 350.0  | 81.00   |
| Ireland    | 60498   | 36926   | 61606 | 5.14       | 0.80     | 42.8   | 395.2  | 4.60    |
| Israel     | 56174   | 65716   | 37293 | 4.75       | 2.35     | 42.1   | 692.1  | 7.80    |
| Italy      | 28981   | 19070   | 30527 | 6.99       | 0.97     | 74.1   | 667.2  | 60.70   |
| Japan      | 36254   | 53308   | 38894 | 8.55       | 2.83     | 73.4   | 2485.5 | 127.00  |
| Jordan     | 15860   | 9855    | 4088  | 5.19       | 6.17     | 26.9   | 809.0  | 6.70    |
| Kosovo     | 13152   | 24617   | 3661  | *          | *        | 1.1    | 400.0  | 1.80    |
| Latvia     | 16834   | 16187   | 14118 | 3.72       | 0.72     | 50.0   | 177.5  | 2.00    |
| Lebanon    | 20280   | 20075   | 7914  | 3.04       | 6.06     | 20.0   | 700.0  | 5.00    |

Supplemental material is neither peer-reviewed nor thoroughly edited by CJASN. The authors alone are responsible for the accuracy and presentation of the material.

|              |       |       |       |       |      |       |        |         |
|--------------|-------|-------|-------|-------|------|-------|--------|---------|
| Lithuania    | 19735 | 20104 | 14880 | 4.45  | 1.46 | 18.7  | 471.0  | 3.00    |
| Macedonia    | 16133 | 18210 | 5237  | 4.10  | 5.47 | 25.2  | 700.0  | 2.10    |
| Malaysia     | 9360  | 9600  | 9503  | 2.30  | 4.96 | 109.0 | 1046.0 | 28.30   |
| Mexico       | 9672  | 4953  | 8201  | 3.26  | 3.07 | 486.6 | 599.5  | 122.30  |
| Montenegro   | 45592 | 20514 | 6701  | 3.67  | 6.72 | 8.3   | 358.3  | 0.60    |
| Morocco      | 6812  | 6812  | 2832  | 2.00  | 3.75 | *     | 311.8  | 34.10   |
| Netherlands  | 89958 | 60312 | 45295 | 9.48  | 0.78 | 51.9  | 335.3  | 16.90   |
| New Zealand  | 26479 | 25526 | 39427 | 9.08  | 0.43 | 178.0 | 404.3  | 4.60    |
| Norway       | 64959 | 45725 | 70812 | 8.31  | 0.28 | 41.0  | 225.4  | 5.20    |
| Panama       | 20721 | 20075 | 13680 | 5.88  | 1.74 | 115.0 | 565.0  | 3.90    |
| Paraguay     | 14040 | 15330 | 4080  | 4.50  | 1.42 | 7.1   | 178.6  | 7.00    |
| Peru         | 12480 | 13870 | 6046  | 3.32  | 2.61 | 50.7  | 363.1  | 29.80   |
| Philippines  | 4710  | 4710  | 2951  | 1.61  | 2.74 | 28.0  | 249.0  | 101.00  |
| Poland       | 16899 | 21488 | 12372 | 4.51  | 1.66 | 28.0  | 513.0  | 38.10   |
| Portugal     | 27472 | 27472 | 19813 | 6.16  | 2.00 | 61.9  | 824.7  | 9.70    |
| PR China     | 8885  | 7823  | 8123  | 3.10  | 1.19 | 51.2  | 292.6  | 1367.00 |
| Romania      | 20692 | 14271 | 9474  | 4.47  | 3.57 | 68.3  | 686.3  | 21.40   |
| Russian Fed  | 14882 | 23640 | 8748  | 3.69  | 0.93 | 13.8  | 179.8  | 143.50  |
| Saudi Arabia | 31200 | 14600 | 20029 | 3.49  | 2.30 | 41.5  | 494.9  | 31.50   |
| Senegal      | 10693 | 12510 | 958   | 2.42  | 2.15 | 3.3   | 42.6   | 12.90   |
| Serbia       | 9645  | 18258 | 5348  | 6.42  | 2.19 | 70.3  | 647.9  | 7.10    |
| Singapore    | 24604 | 10563 | 52961 | 2.05  | 3.36 | 191.5 | 1404.4 | 5.40    |
| Slovak Rep.  | 21744 | 24617 | 16496 | 5.84  | 1.43 | 17.0  | 615.6  | 5.40    |
| Slovenia     | 38578 | 33644 | 21305 | 6.62  | 1.85 | 24.8  | 642.4  | 2.10    |
| South Africa | 13712 | 7300  | 5274  | 4.24  | 0.92 | 25.6  | 136.0  | 50.60   |
| South Korea  | 19812 | 15330 | 27539 | 3.99  | 2.56 | 152.5 | 1299.5 | 48.20   |
| Spain        | 24374 | 54158 | 26528 | 6.40  | 0.92 | 81.6  | 462.6  | 46.20   |
| St Maarten   | 67904 | *     | 28084 | *     | *    |       | 1340.0 | 0.05    |
| Sweden       | 72858 | *     | 51600 | 10.02 | 0.38 | 133.3 | 266.7  | 9.90    |
| Switzerland  | 85132 | 75165 | 78813 | 7.70  | 0.53 | 37.0  | 344.0  | 8.00    |
| Thailand     | 7020  | 6000  | 5908  | 3.21  | 3.48 | 243.1 | 731.9  | 69.50   |
| Tunisia      | 5980  | 5520  | 3689  | 3.97  | 3.35 | 28.0  | 794.4  | 10.70   |
| Turkey       | 9100  | 2346  | 10788 | 4.19  | 1.41 | 59.2  | 687.1  | 76.70   |
| UK           | 30152 | 20833 | 39899 | 7.58  | 0.39 | 56.2  | 351.3  | 64.60   |
| Uruguay      | 23400 | 13200 | 15221 | 6.11  | 1.89 | 80.9  | 705.9  | 3.40    |
| USA          | 36036 | 36036 | 57467 | 8.28  | 1.10 | 140.9 | 1311.9 | 322.40  |

HD and PD funding: annual funding per patient for hemodialysis and peritoneal dialysis in US\$. GDPc: gross domestic product per capita in US\$. Public HE (%GDP): % of GDP spent on public health expenditure. Dialysis funding (%HE): % public health expenditure spent on public funding of dialysis. HD pmp: prevalence of hemodialysis per million population. PD pmp: prevalence of peritoneal dialysis per million population. POP: Population in million inhabitants.

\* unknown  
 \*\* no reimbursement  
 \*\*\* PD is not available

Supplemental Table 2. Funding and country characteristics. HD and PD funding: annual funding per patient for hemodialysis and peritoneal dialysis in US\$. GDPc: gross domestic product per capita in US\$. Public HE (%GDP): % of GDP spent on public health expenditure. Dialysis funding (%HE): % public health expenditure spent on public funding of dialysis. HD pmp: prevalence of hemodialysis per million population. PD pmp: prevalence of peritoneal dialysis per million population. POP: Population in million inhabitants.

Supplemental material is neither peer-reviewed nor thoroughly edited by CJASN. The authors alone are responsible for the accuracy and presentation of the material.

**Supplemental Table 3. Countries with a pay-for-quality reimbursement system for dialysis**

| Country                  | PTH | Kt/V | Access | Ca and/or P | Pre-dialysis education | Hb | Time | Water quality | Infection control |
|--------------------------|-----|------|--------|-------------|------------------------|----|------|---------------|-------------------|
| Argentina <sup>°</sup>   | X   | X    | X      |             |                        |    |      |               |                   |
| Australia <sup>° °</sup> |     |      | X      |             | X                      |    |      |               |                   |
| Bulgaria                 |     |      |        | X           |                        | X  |      |               |                   |
| Peru                     |     | X    |        |             |                        |    | X    |               |                   |
| Poland                   |     | X    |        |             |                        | X  |      |               |                   |
| Portugal                 |     | X    |        | X           |                        | X  | X    |               |                   |
| Kosovo                   |     | X    |        |             |                        |    |      |               |                   |
| China PR                 | X   | X    |        | X           |                        | X  | X    | X             | X                 |
| USA                      |     | X    | X      | X           |                        | X  |      |               | X                 |

<sup>°</sup>only with certain funders, <sup>°°</sup> only in certain states

Countries with a pay-for-quality system for dialysis. Government funding is made dependent on parathyroid hormone (PTH) level, urea clearance Kt/V, dialysis access type, calcium and/or phosphate level (Ca and/or P), pre-dialysis education delivered, haemoglobin (Hb), dialysis length (time), water quality, and/or infection control.

Supplemental Table 3. Countries with a pay-for-quality system for dialysis. Government funding is made dependent on parathyroid hormone (PTH) level, urea clearance Kt/V, dialysis access type, calcium and/or phosphate level (Ca and/or P), pre-dialysis education delivered, haemoglobin (Hb), dialysis length (time), water quality, and/or infection control.

Supplemental material is neither peer-reviewed nor thoroughly edited by CJASN. The authors alone are responsible for the accuracy and presentation of the material.

**Supplemental Table 4. CKD prevention strategies according to World Bank income groups.**

| CKD Prevention strategies                | total n=90 | LIC/LMIC<br>n=18 | UMIC<br>n=31 | HIC<br>N=41 |
|------------------------------------------|------------|------------------|--------------|-------------|
| No CKD screening or prevention           | 56 (62)    | 14 (78)          | 18 (58)      | 24 (59)     |
| No specified CKD screening or prevention | 10 (11)    | 1 (6)            | 4 (13)       | 5 (12)      |
| CKD screening in high risk populations   | 19 (21)    | 3 (17)           | 6 (19)       | 10 (24)     |
| Pay for performance                      | 4 (4)      | 0                | 0            | 4 (10)      |
| Awareness campaign                       | 7 (8)      | 1 (6)            | 2 (6)        | 4 (10)      |

Prevention strategies according different World Bank income groups. LIC: low income countries, LMIC: lower-middle income countries, UMIC: upper-middle income countries, HIC: high income countries, CKD: chronic kidney disease. None of the differences were significant.

Supplemental Table 4. Prevention strategies according to different World Bank income groups. LIC: low income countries, LMIC: lower-middle income countries, UMIC: upper-middle income countries, HIC: high income countries, CKD: chronic kidney disease.
